# Supplementary material for: Applying quality improvement methods to address gaps in medicines reconciliation at transfers of care from an acute UK hospital
Source: PubMed Central journal article supplement (PMC4908889; doi:10.1136/bmjopen-2015-010230), 2016-06-09
Supplement: bmjopen-2015-010230supp.pdf [file bmjopen-2015-010230supp.pdf]

Appendix

Figure 1. Stakeholder Management Matrix – baseline

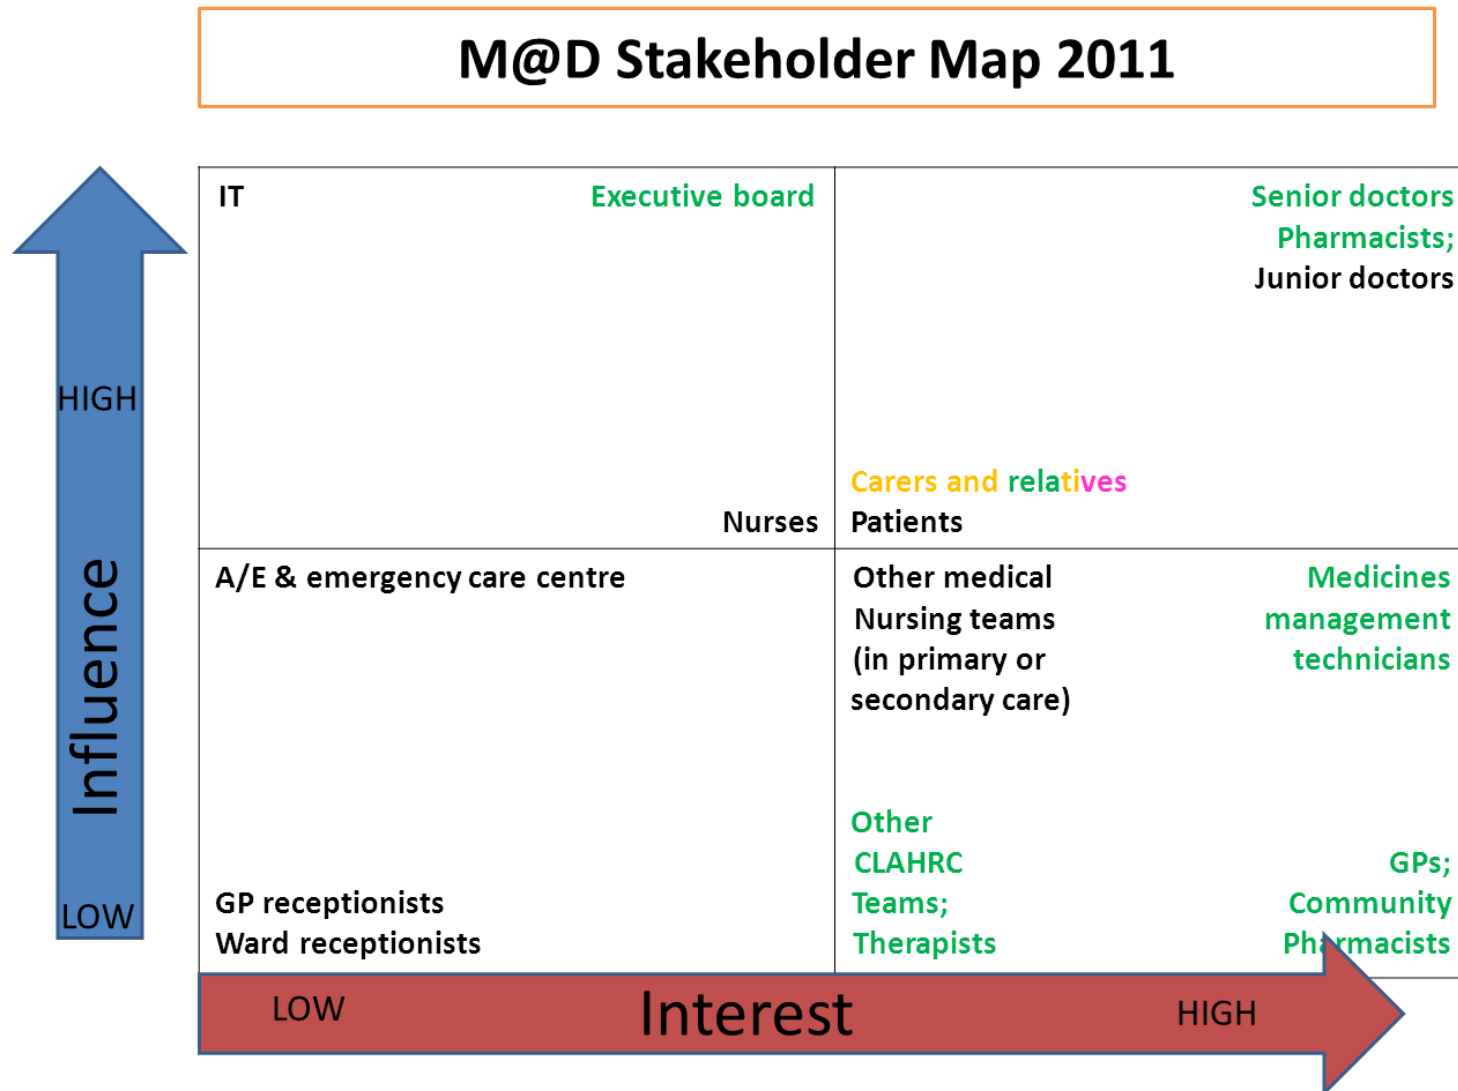



**Figure 3. Process map – higher level**

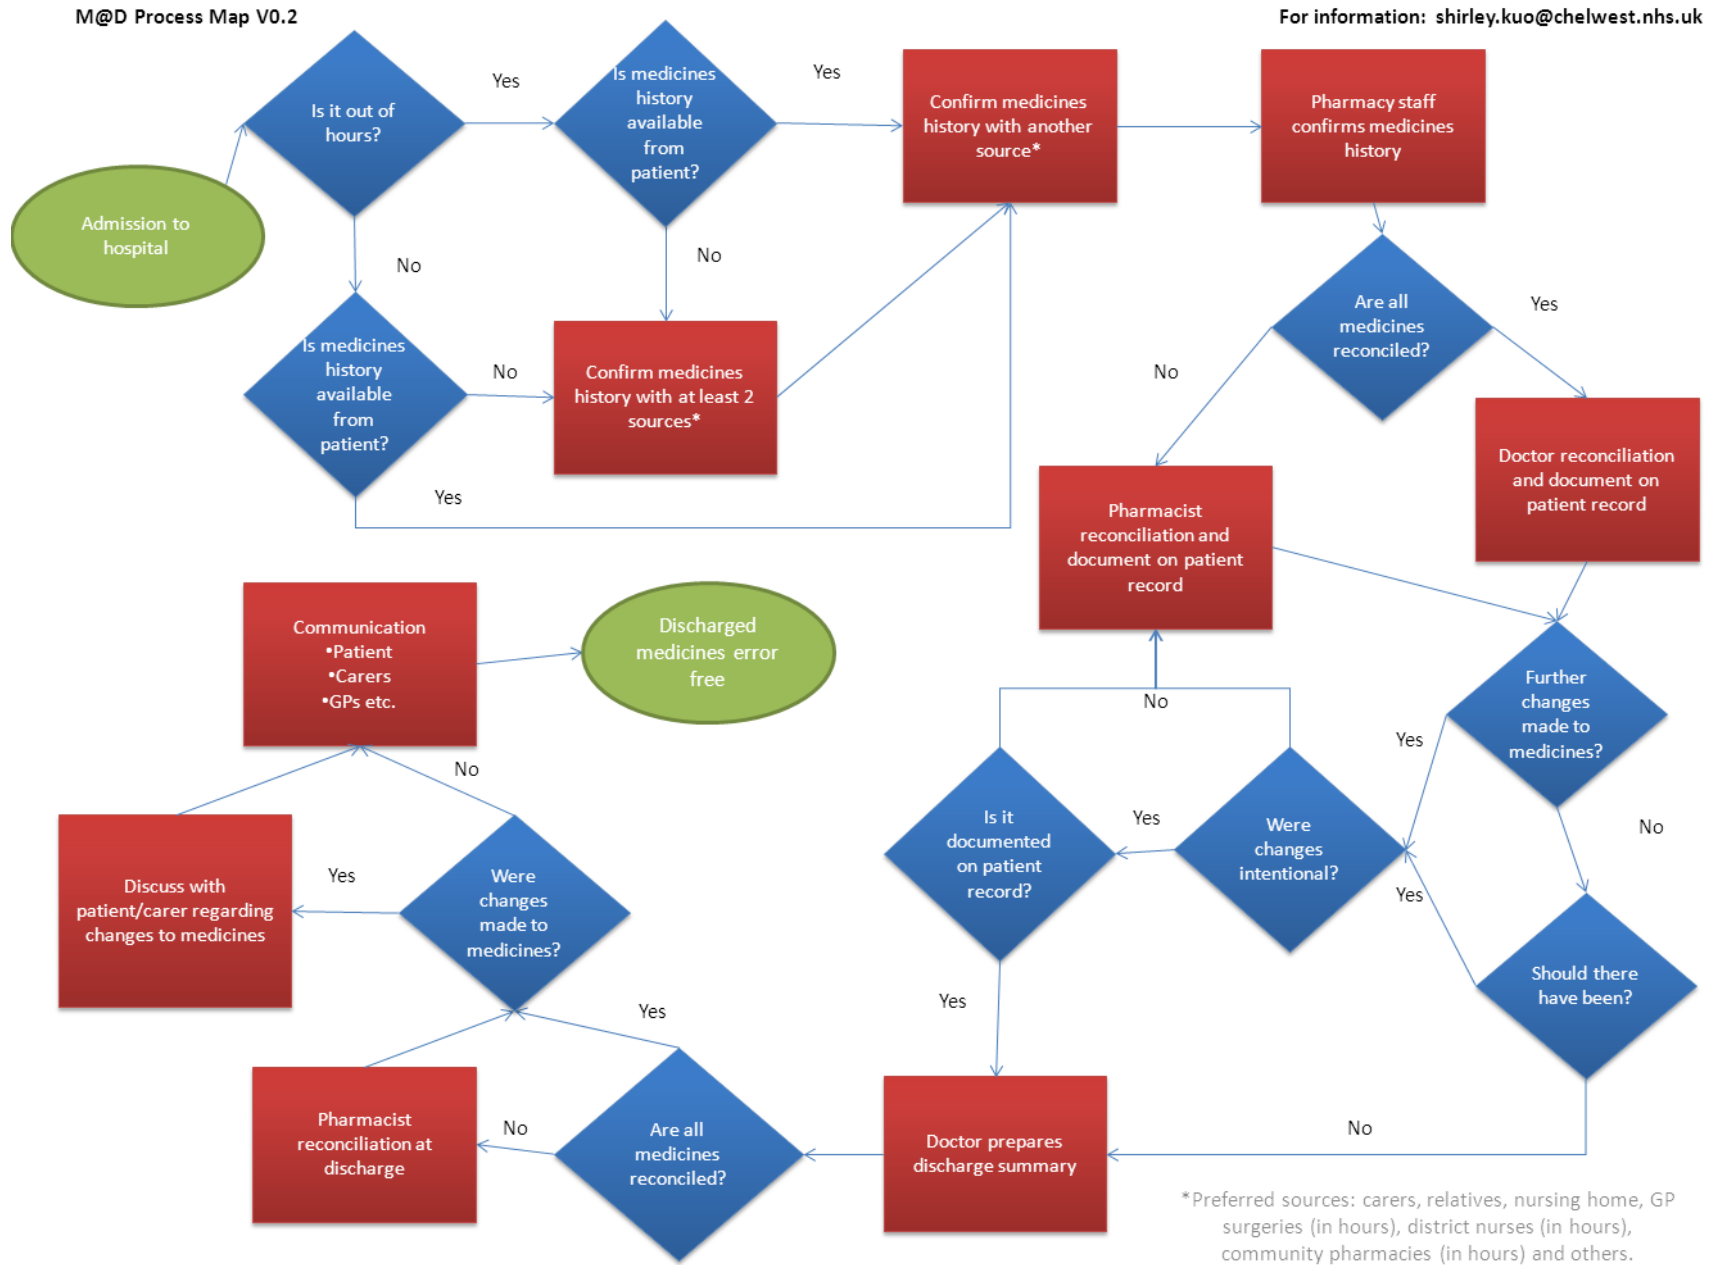

Figure 4. Process map – lower level (AAU)

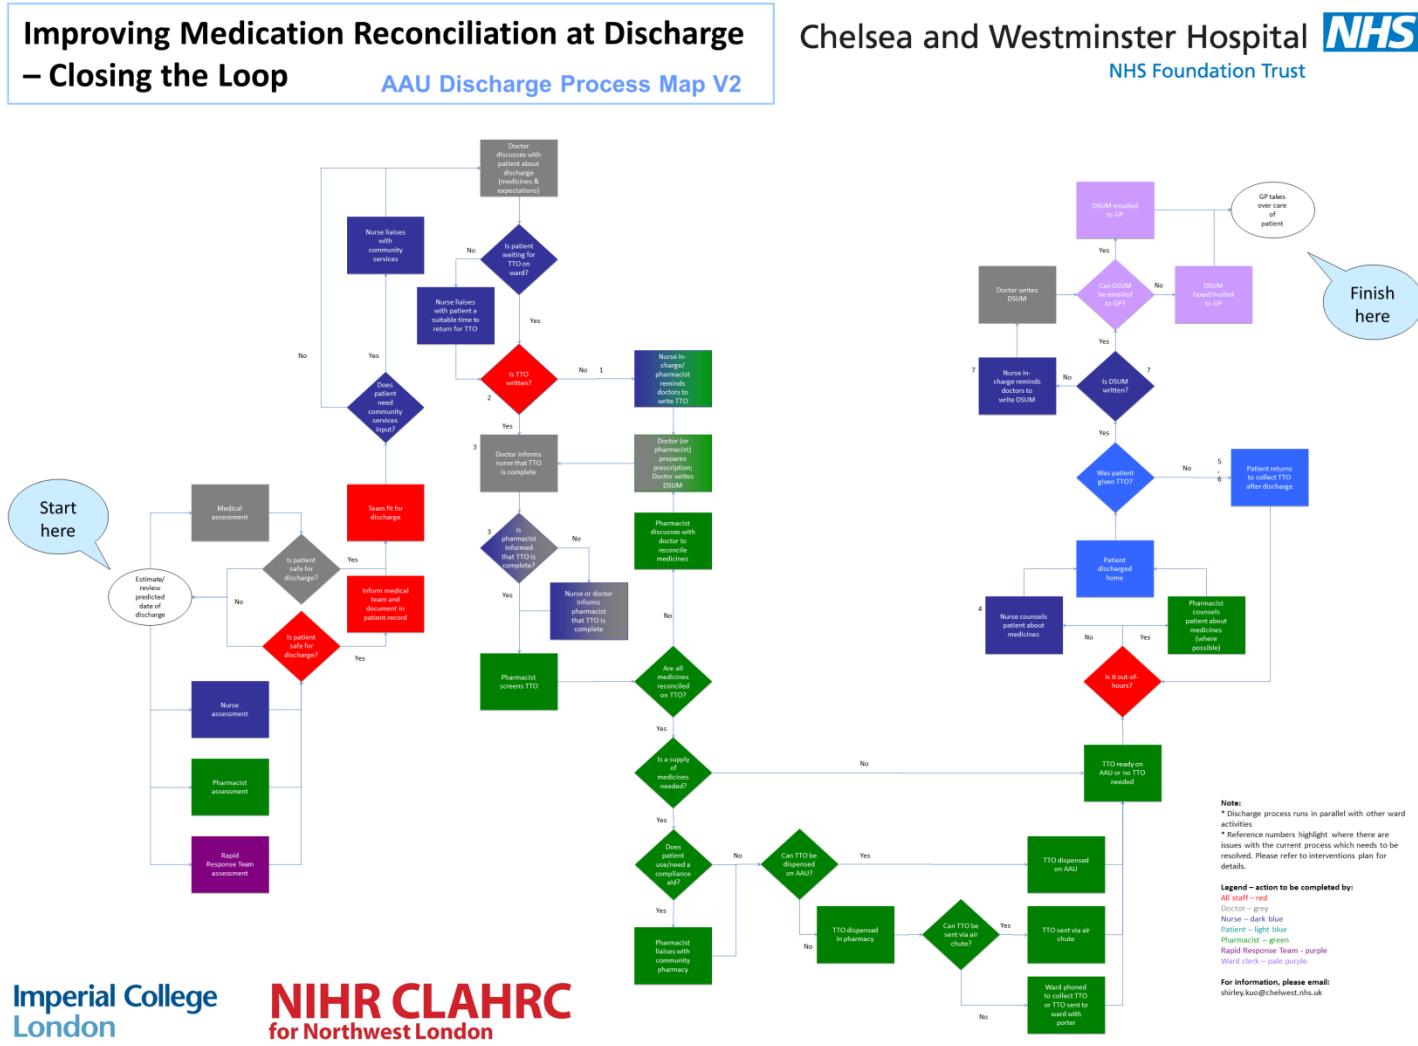

**Figure 5. Embedded interventions and stakeholder groups**

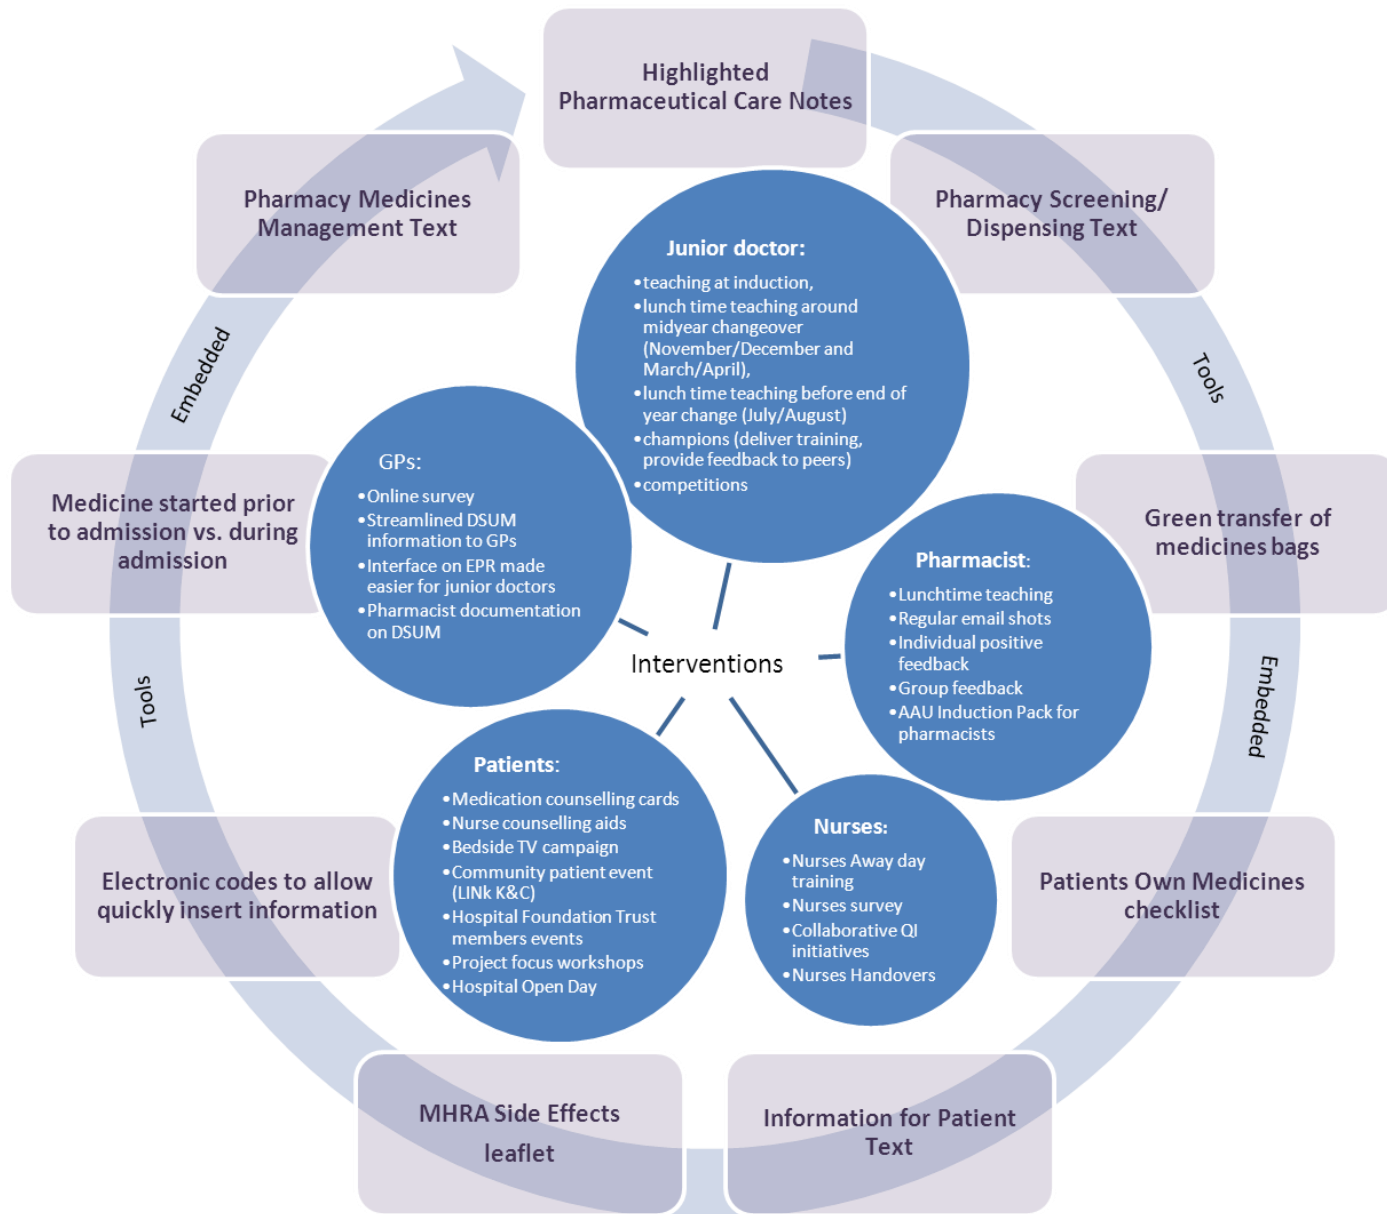

Figure 6. Action Effect Diagram

**NIHR CLAHRC**  
for Northwest London

**Medicines Reconciliation at Discharge –  
Closing the loop : ACTION EFFECT DIAGRAM**

**NHS**  
National Institute for  
Health Research

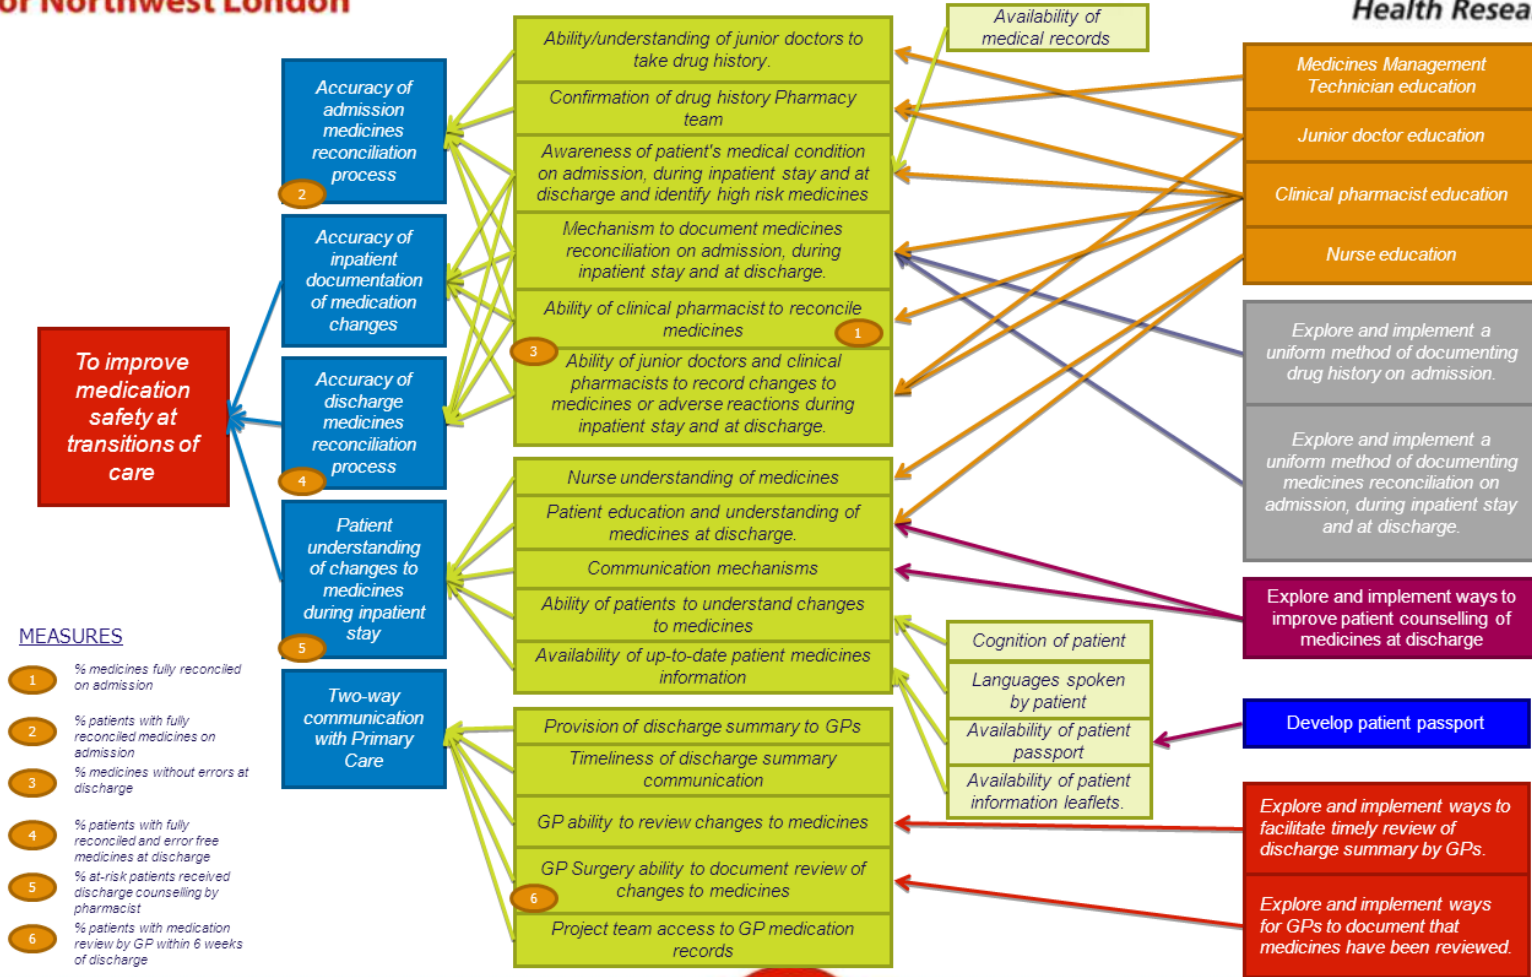

**MEASURES**

- 1 % medicines fully reconciled on admission
- 2 % patients with fully reconciled medicines on admission
- 3 % medicines without errors at discharge
- 4 % patients with fully reconciled and error free medicines at discharge
- 5 % at-risk patients received discharge counselling by pharmacist
- 6 % patients with medication review by GP within 6 weeks of discharge

Imperial College  
London

in  
partnership  
with  
Northwest  
London

Chelsea and Westminster Hospital **NHS**  
NHS Foundation Trust

## Appendix Table 1. Plan-Do-Study-Act Cycles

| Series Number      | Cycle title                                               |
|--------------------|-----------------------------------------------------------|
| Series 1a: 19/5/11 | Transfer of medicines from AAU                            |
| Series 1b: 27/5/11 | Transfer of medicines from AAU                            |
| Series 1c: 8/7/11  | Transfer of medicines from AAU - Downstream wards         |
| Series 1d: 22/9/11 | Transfer of medicines from AAU - Nurses survey            |
| Series 2: 21/5/12  | TTO turnaround time - Pharmacist tracking                 |
| Series 3a: 6/12/11 | Uncollected TTOs                                          |
| Series 3b: 1/5/12  | Uncollected TTOs                                          |
| Series 4a: 11/2/12 | Nurse training package - Nurse questionnaire (AAU)        |
| Series 4b: 27/2/12 | Nurse training package - Nurse questionnaire (Trust-wide) |
| Series 5: 28/5/12  | AAU pharmacy process review                               |
| Series 6: 3/9/12   | GP survey                                                 |
| Series 7: 14/6/12  | Improvement measures                                      |

Key:

AAU = Acute Admissions Unit

TTO = To take out (medicines)

GP = General Practitioner
